# Supplementary material for: Genetic and Clinical Factors Associated with Opioid Response in Chinese Han Patients with Cancer Pain: An Exploratory Cross-Sectional Study
Source: PubMed Central journal article supplement — Pain Ther. 2022 Feb 2;11(1):269–88. doi: 10.1007/s40122-022-00353-5 (PMC8861215; doi:10.1007/s40122-022-00353-5), 2022-02-02
Supplement: 40122_2022_353_MOESM1_ESM.pdf [file 40122_2022_353_MOESM1_ESM.pdf]

# **Genetic and Clinical Factors Associated with Opioid Response in Chinese Han Patients with Cancer Pain: an exploratory cross-sectional study**

**Chen Shi · Jinmei Liu · Jianli Hu · Xu Chen · Jiye Xie · Juan Luo · Cong Wang · Hanxiang Wang · Qi Yuan · Haixia Zhu · Weijing Gong · Shijun Li · Hong Zhou · Leiyun Wang · Hui Wang · Yu Zhang**

C. Shi · J. M. Liu · X. Chen · J. Y. Xie · J. Luo · C. Wang · H. X. Wang · Q. Yuan · H. X. Zhu · W. J. Gong · S. J. Li · H. Zhou · Y. Zhang (✉)

Department of Pharmacy, Union Hospital, Tongji Medical College, Huazhong University of Science & Technology (HUST), Wuhan, P.R. China

Email: [whxhzy@163.com](mailto:whxhzy@163.com)

C. Shi · J. M. Liu · X. Chen · J. Y. Xie · J. Luo · C. Wang · H. X. Wang · Q. Yuan · H. X. Zhu · W. J. Gong · S. J. Li · H. Zhou · Y. Zhang (✉)

Hubei Province Clinical Research Center for Precision Medicine for Critical Illness, Wuhan 430022, China

Email: [whxhzy@163.com](mailto:whxhzy@163.com)

J. L. Hu

Cancer Center, Union Hospital, Tongji Medical College, Huazhong University of Science and Technology, Wuhan, China

L. Y. Wang

Department of Clinical Pharmacology, Xiangya Hospital, Central South University, Changsha 410078, Hunan, P. R. China

H. Wang

Department of Clinical Laboratory, Union Hospital, Tongji Medical College, Huazhong University of Science and Technology, Wuhan 430022, China

**C. Shi and J. M. Liu have contributed equally to this work and share first authorship**

**Supplementary Table 1** Characteristics and annotation of all genotyped SNPs

| SNPs      | Chr | Chromosome position | Genes    | Localization | Minor allele | Major allele | MAF in development sample | MAF in validation sample | Gene function                                             |
|-----------|-----|---------------------|----------|--------------|--------------|--------------|---------------------------|--------------------------|-----------------------------------------------------------|
| rs3845446 | 1   | 181766437           | CACNA1E  | Intron       | C            | T            | 0.277                     | 0.299                    | R-type ('high-voltage activated') calcium channel subunit |
| rs2995082 | 1   | 167406245           | CD247    | Intron       | C            | T            | 0.329                     | 0.326                    | transmembrane signaling adaptor protein                   |
| rs2234918 | 1   | 29189597            | OPRD1    | Exon         | C            | T            | 0.203                     | 0.219                    | Opioid receptors                                          |
| rs2236857 | 1   | 29161609            | OPRD1    | Intron       | C            | T            | 0.105                     | 0.086                    | Opioid receptors                                          |
| rs419335  | 1   | 29151844            | OPRD1    | Intron       | G            | A            | 0.191                     | 0.175                    | Opioid receptors                                          |
| rs529520  | 1   | 29174946            | OPRD1    | Intron       | A            | C            | 0.138                     | 0.121                    | Opioid receptors                                          |
| rs581111  | 1   | 29175373            | OPRD1    | Intron       | A            | G            | 0.075                     | 0.081                    | Opioid receptors                                          |
| rs1042114 | 1   | 28812463            | OPRD1    | Intron       | G            | C, T         | NA                        | NA                       | Opioid receptors                                          |
| rs533123  | 1   | 28814643            | OPRD1    | Intron       | G            | A, C         | NA                        | NA                       | Opioid receptors                                          |
| rs5275    | 1   | 186643058           | PTGS2    | 3'-UTR       | G            | A            | 0.177                     | 0.188                    | mediates the formation of prostaglandins                  |
| rs5277    | 1   | 186648197           | PTGS2    | 5' near gene | G            | C            | 0.057                     | 0.051                    | mediates the formation of prostaglandins                  |
| rs1061622 | 1   | 12192898            | TNFRSF1B | Intron       | T            | G            | NA                        | NA                       | tumor necrosis factor receptor                            |

|            |   |           |        |              |   |   |       |       |                                                                                        |
|------------|---|-----------|--------|--------------|---|---|-------|-------|----------------------------------------------------------------------------------------|
| rs2952768  | 2 | 208494234 | CREB1  | /            | C | T | 0.423 | 0.439 | induces transcription of genes in response to hormonal stimulation of the cAMP pathway |
| rs1143634  | 2 | 113590390 | IL1B   | Exon         | A | G | 0.021 | 0.019 | cytokine produced by activated macrophages and involved in the inflammatory response   |
| rs1143627  | 2 | 113594387 | IL1B   | 5'-UTR       | G | A | 0.476 | 0.481 | cytokine produced by activated macrophages and involved in the inflammatory response   |
| rs2110726  | 2 | 102794282 | IL1R1  | 3' near gene | A | G | 0.386 | 0.362 | cytokine receptor for interleukin 1                                                    |
| rs7574878  | 2 | 155607148 | KCNJ3  | 3' near gene | G | T | 0.471 | 0.465 | GPCR-regulated potassium channel GIRK1                                                 |
| rs6853     | 3 | 38184370  | MYD88  | 3'-UTR       | G | A | 0.014 | 0.017 | inhibits the activity of NF-Kappa-B complexes                                          |
| rs3732765  | 3 | 151090424 | P2RY12 | 3' near gene | A | G | 0.139 | 0.154 | G-protein coupled receptor                                                             |
| rs9859538  | 3 | 151090963 | P2RY12 | 3' near gene | A | G | 0.144 | 0.161 | G-protein coupled receptor                                                             |
| rs12645107 | 4 | 69988999  | UGT2B7 | /            | A | G | 0.365 | 0.406 | induces transcription of genes in response to hormonal stimulation of the cAMP pathway |
| rs4073     | 4 | 74606024  | CXCL8  | 5' near gene | A | T | 0.402 | 0.405 | a major mediator of the inflammatory response                                          |
| rs2069762  | 4 | 123377980 | IL2    | 5' near gene | C | A | 0.335 | 0.314 | cytokine involved in inflammatory response                                             |
| rs6845322  | 4 | 157884105 | PDGFC  | Intron       | G | A | 0.433 | 0.439 | catalytic receptors that have intracellular tyrosine kinase activity                   |

|            |   |          |        |              |   |   |       |       |                                                                                           |
|------------|---|----------|--------|--------------|---|---|-------|-------|-------------------------------------------------------------------------------------------|
| rs10028494 | 4 | 69970937 | UGT2B7 | Intron       | C | A | 0.250 | 0.234 | conjugation of potentially toxic xenobiotics and endogenous compounds including estrogens |
| rs11931604 | 4 | 69928547 | UGT2B7 | 5' near gene | C | T | 0.038 | 0.023 | conjugation of potentially toxic xenobiotics and endogenous compounds including estrogens |
| rs4235108  | 4 | 69893854 | UGT2B7 | /            | A | G | 0.451 | 0.418 | conjugation of potentially toxic xenobiotics and endogenous compounds including estrogens |
| rs4296738  | 4 | 69893704 | UGT2B7 | /            | A | G | 0.175 | 0.170 | conjugation of potentially toxic xenobiotics and endogenous compounds including estrogens |
| rs6851533  | 4 | 69978750 | UGT2B7 | 3' near gene | T | C | 0.337 | 0.323 | conjugation of potentially toxic xenobiotics and endogenous compounds including estrogens |
| rs7438135  | 4 | 69961339 | UGT2B7 | Intron       | G | A | 0.336 | 0.329 | conjugation of potentially toxic xenobiotics and endogenous compounds including estrogens |
| rs7439366  | 4 | 69964338 | UGT2B7 | Exon         | T | C | 0.334 | 0.329 | conjugation of potentially toxic xenobiotics and endogenous compounds including estrogens |
| rs7668282  | 4 | 69962114 | UGT2B7 | Intron       | C | T | 0.078 | 0.072 | conjugation of potentially toxic xenobiotics and endogenous compounds including estrogens |

|            |   |           |         |              |     |      |       |       |                                                                                           |
|------------|---|-----------|---------|--------------|-----|------|-------|-------|-------------------------------------------------------------------------------------------|
| rs4587017  | 4 | 69947398  | UGT2B7  | Intron       | T   | G    | 0.334 | 0.327 | conjugation of potentially toxic xenobiotics and endogenous compounds including estrogens |
| rs1042713  | 5 | 148206440 | ADRB2   | Exon         | G   | A    | 0.431 | 0.425 | adrenergic signaling                                                                      |
| rs12654778 | 5 | 148205741 | ADRB2   | 5' near gene | A   | G    | 0.365 | 0.392 | adrenergic signaling                                                                      |
| rs11959113 | 5 | 148848933 | ADRB2   | /            | G   | A, C | NA    | NA    | adrenergic signaling                                                                      |
| rs1295686  | 5 | 131995843 | IL13    | Intron       | T   | C    | 0.327 | 0.313 | anti-inflammatory cytokine                                                                |
| rs1799971  | 6 | 154360797 | OPRM1   | Intron       | G   | A    | 0.341 | 0.376 | Opioid receptors                                                                          |
| rs497976   | 6 | 154442512 | OPRM1   | 3' near gene | T   | G    | 0.102 | 0.116 | Opioid receptors                                                                          |
| rs533586   | 6 | 154413674 | OPRM1   | 3' near gene | C   | T    | 0.128 | 0.136 | Opioid receptors                                                                          |
| rs540825   | 6 | 154414446 | OPRM1   | Intron       | A   | T    | 0.071 | 0.079 | Opioid receptors                                                                          |
| rs548646   | 6 | 154418147 | OPRM1   | 3' near gene | T   | C    | 0.124 | 0.135 | Opioid receptors                                                                          |
| rs562859   | 6 | 154414573 | OPRM1   | Intron       | C   | T    | 0.130 | 0.136 | Opioid receptors                                                                          |
| rs563649   | 6 | 154407967 | OPRM1   | 5' near gene | T   | C    | 0.090 | 0.093 | Opioid receptors                                                                          |
| rs589046   | 6 | 154393138 | OPRM1   | 5' near gene | T   | C    | 0.149 | 0.147 | Opioid receptors                                                                          |
| rs639855   | 6 | 154436714 | OPRM1   | 3' near gene | A   | C    | 0.104 | 0.114 | Opioid receptors                                                                          |
| rs6912029  | 6 | 154360508 | OPRM1   | 5'-UTR       | T   | G    | 0.089 | 0.093 | Opioid receptors                                                                          |
| rs9479757  | 6 | 154411344 | OPRM1   | Intron       | A   | G    | 0.059 | 0.058 | Opioid receptors                                                                          |
| rs1323042  | 6 | 154421844 | OPRM1   | 3' near gene | G   | T    | 0.222 | 0.223 | Opioid receptors                                                                          |
| rs1323040  | 6 | 154010889 | OPRM1   | 5'-UTR       | A   | G    | NA    | NA    | Opioid receptors                                                                          |
| rs34059508 | 6 | 160154805 | SLC22A1 | Intron       | G   | A, C | NA    | NA    | Polyspecific organic cation transporters                                                  |
| rs12208357 | 6 | 160122116 | SLC22A1 | Intron       | C   | T    | NA    | NA    | Polyspecific organic cation transporters                                                  |
| rs72552763 | 6 | 160139851 | SLC22A1 | Exon         | GAT | -    | NA    | NA    | Polyspecific organic cation transporters                                                  |

|                 |   |           |         |              |   |      |       |       |                                              |
|-----------------|---|-----------|---------|--------------|---|------|-------|-------|----------------------------------------------|
| rs34130495      | 6 | 160139792 | SLC22A1 | Intron       | G | A    | NA    | NA    | Polyspecific organic cation transporters     |
| rs1799964       | 6 | 31542308  | TNF     | 3' near gene | C | T    | 0.175 | 0.161 | mediated peripheral and central inflammation |
| rs1800610       | 6 | 31543827  | TNF     | Intron       | A | G    | 0.135 | 0.142 | mediated peripheral and central inflammation |
| rs1800629       | 6 | 31543031  | TNF     | 5' near gene | A | G    | 0.058 | 0.068 | mediated peripheral and central inflammation |
| rs1045046       | 7 | 131186336 | ABCB1   | 3'-UTR       | C | G    | 0.479 | 0.497 | ATP-dependent drug efflux pump               |
| rs1045642       | 7 | 87138645  | ABCB1   | Exon         | A | G    | 0.379 | 0.376 | ATP-dependent drug efflux pump               |
| rs1202170       | 7 | 87195106  | ABCB1   | Intron       | C | T    | 0.354 | 0.346 | ATP-dependent drug efflux pump               |
| rs13229143      | 7 | 87219481  | ABCB1   | Intron       | G | C    | 0.481 | 0.497 | ATP-dependent drug efflux pump               |
| rs2235033       | 7 | 87179143  | ABCB1   | Intron       | G | A    | 0.355 | 0.346 | ATP-dependent drug efflux pump               |
| rs4437575       | 7 | 87139316  | ABCB1   | Intron       | G | A    | 0.200 | 0.196 | ATP-dependent drug efflux pump               |
| rs1128503       | 7 | 87179601  | ABCB1   | Exon         | G | A    | 0.351 | 0.346 | ATP-dependent drug efflux pump               |
| rs2235013       | 7 | 87178626  | ABCB1   | Intron       | T | C    | 0.352 | 0.346 | ATP-dependent drug efflux pump               |
| rs2032582       | 7 | 87531302  | ABCB1   | Exon         | A | C, T | NA    | NA    | ATP-dependent drug efflux pump               |
| rs75489106<br>0 | 7 | 87544156  | ABCB1   | Exon         | A | C, G | NA    | NA    | ATP-dependent drug efflux pump               |
| rs2242480       | 7 | 99361466  | CYP3A4  | Intron       | T | C    | 0.265 | 0.284 | drug metabolizing enzymes                    |
| rs2069845       | 7 | 22770149  | IL6     | 3'-UTR       | G | A    | 0.012 | 0.016 | cytokine involved in inflammatory response   |
| rs1800795       | 7 | 22727026  | IL6     | 5' near gene | C | G, T | NA    | NA    | cytokine involved in inflammatory response   |
| rs7803773       | 7 | 79045055  | MAGI2   | 5' near gene | C | A    | 0.243 | 0.248 | transcription factor                         |
| rs1800783       | 7 | 150689397 | NOS3    | 5' near gene | A | T    | 0.123 | 0.101 | involved in nitric oxide synthesis           |

|            |    |           |               |              |   |         |       |       |                                                                                                                                       |
|------------|----|-----------|---------------|--------------|---|---------|-------|-------|---------------------------------------------------------------------------------------------------------------------------------------|
| rs2073618  | 8  | 118951813 | TNFRSF1<br>1B | Exon         | G | C       | NA    | NA    | TNF-receptor superfamily                                                                                                              |
| rs1365098  | 8  | 54152683  | OPRK1         | Intron       | A | C       | 0.384 | 0.381 | Opioid receptors                                                                                                                      |
| rs6473799  | 8  | 54153123  | OPRK1         | Intron       | G | A       | 0.384 | 0.383 | Opioid receptors                                                                                                                      |
| rs7016778  | 8  | 54150105  | OPRK1         | Intron       | T | A       | 0.080 | 0.098 | Opioid receptors                                                                                                                      |
| rs7824175  | 8  | 54144174  | OPRK1         | Intron       | G | C       | 0.087 | 0.092 | Opioid receptors                                                                                                                      |
| rs7836120  | 8  | 54157539  | OPRK1         | Intron       | C | T       | 0.243 | 0.257 | Opioid receptors                                                                                                                      |
| rs963549   | 8  | 54141824  | OPRK1         | 3'-UTR       | T | C       | 0.073 | 0.073 | Opioid receptors                                                                                                                      |
| rs10504151 | 8  | 53245680  | OPRK1         | Intron       | A | G       | NA    | NA    | Opioid receptors                                                                                                                      |
| rs16918875 | 8  | 53229594  | OPRK1         | Exon         | G | A       | NA    | NA    | Opioid receptors                                                                                                                      |
| rs3780039  | 8  | 139664421 | KCNK9         | 5' near gene | A | C       | NA    | NA    | pH-dependent potassium channel                                                                                                        |
| rs11166921 | 8  | 139695512 | KCNK9         | 5' near gene | A | C, G, T | NA    | NA    | pH-dependent potassium channel<br>promotes the attachment of spinal<br>cord and sensory neuron cells and the<br>outgrowth of neurites |
| rs17180299 | 9  | 82944202  | SPON1         | /            | G | A       | 0.097 | 0.093 |                                                                                                                                       |
| rs2756109  | 10 | 101558746 | ABCC2         | Intron       | T | G       | 0.308 | 0.307 | ATP-dependent drug efflux pump                                                                                                        |
| rs1800545  | 10 | 112837538 | ADRA2A        | 5'-UTR       | A | G       | 0.171 | 0.152 | adrenergic signaling                                                                                                                  |
| rs11195419 | 10 | 112839368 | ADRA2A        | 3'-UTR       | A | C       | 0.174 | 0.154 | adrenergic signaling                                                                                                                  |
| rs553668   | 10 | 111079821 | ADRA2A        | 3'-UTR       | A | G, T    | NA    | NA    | adrenergic signaling                                                                                                                  |
| rs580253   | 11 | 105029761 | CASP1         | Exon         | G | A       | NA    | NA    | a member of the cysteine-aspartic acid<br>protease (caspase) family                                                                   |
| rs554344   | 11 | 105024470 | CASP5         | 5'-UTR       | G | A, C    | NA    | NA    | a member of the cysteine-aspartic<br>acid protease (caspase) family                                                                   |
| rs6265     | 11 | 27679916  | BDNF          | Exon         | T | C       | 0.465 | 0.474 | neuron growth and survival factor;<br>major regulator of synaptic<br>transmission and plasticity in adults                            |

|            |    |           |                  |              |   |      |       |       |                                                                       |
|------------|----|-----------|------------------|--------------|---|------|-------|-------|-----------------------------------------------------------------------|
| rs618027   | 11 | 124584312 | /                | /            | C | G    | 0.376 | 0.413 | Opioid receptors                                                      |
| rs7965399  | 12 | 102891686 | LOC10536<br>9944 | Intron       | C | T    | 0.286 | 0.276 | transcription factor                                                  |
| rs1718125  | 12 | 121593019 | P2RX7            | 3' near gene | T | C    | 0.351 | 0.322 | extracellular ATP-gated ion channel                                   |
| rs7958311  | 12 | 121605355 | P2RX7            | Exon         | A | G    | 0.448 | 0.460 | extracellular ATP-gated ion channel                                   |
| rs10770367 | 12 | 18663922  | PIK3C2G          | Intron       | C | A    | 0.375 | 0.316 | play roles in signaling pathways                                      |
| rs167769   | 12 | 57503775  | STAT6            | 5'-UTR       | T | C    | 0.221 | 0.203 | plays a central role in exerting IL4<br>mediated biological responses |
| rs3024971  | 12 | 57493727  | STAT6            | Intron       | G | T    | 0.059 | 0.065 | plays a central role in exerting IL5<br>mediated biological responses |
| rs841718   | 12 | 57492996  | STAT6            | Intron       | A | G    | 0.304 | 0.276 | plays a central role in exerting IL6<br>mediated biological responses |
| rs9524885  | 13 | 95935589  | ABCC4            | 5' near gene | T | C    | 0.336 | 0.348 | ATP-dependent drug efflux pump                                        |
| rs3783641  | 14 | 55360139  | GCH1             | Intron       | A | T    | 0.122 | 0.112 | rate-limiting enzyme for BH4<br>synthesis                             |
| rs4411417  | 14 | 55320563  | GCH1             | Intron       | C | T    | 0.362 | 0.347 | rate-limiting enzyme for BH5<br>synthesis                             |
| rs752668   | 14 | 98366896  | GCH1             | /            | G | A    | 0.276 | 0.290 | rate-limiting enzyme for BH6<br>synthesis                             |
| rs8904     | 14 | 35871217  | NFKB1A           | 3'-UTR       | A | G    | 0.398 | 0.412 | inhibits the activity of NF-Kappa-B<br>complexes                      |
| rs6572493  | 14 | 22503969  | LOC11226<br>7867 | Intron       | A | G    | NA    | NA    | an RNA Gene                                                           |
| rs1805009  | 16 | 89920138  | MC1R             | 5' near gene | G | A, C | NA    | NA    | melanocyte-stimulating hormone<br>receptor                            |



|            |    |          |        |              |   |         |       |       |                                                                                     |
|------------|----|----------|--------|--------------|---|---------|-------|-------|-------------------------------------------------------------------------------------|
| rs4793665  | 17 | 48712087 | ABCC3  | 5' near gene | C | T       | 0.111 | 0.107 | ATP-dependent drug efflux pump                                                      |
| rs1045280  | 17 | 4622638  | ARRB2  | Exon         | C | T       | 0.190 | 0.181 | adrenergic signaling                                                                |
| rs16954146 | 17 | 4618472  | ARRB2  | Intron       | A | G       | 0.189 | 0.182 | adrenergic signaling                                                                |
| rs2036657  | 17 | 4625159  | ARRB2  | 3' near gene | G | A       | 0.189 | 0.184 | adrenergic signaling                                                                |
| rs2271167  | 17 | 4622880  | ARRB2  | Intron       | A | G       | 0.180 | 0.170 | adrenergic signaling                                                                |
| rs3786047  | 17 | 4615098  | ARRB2  | Exon         | A | G       | 0.189 | 0.180 | adrenergic signaling                                                                |
| rs4790693  | 17 | 4711302  | ARRB2  | 5' near gene | C | A, G, T | NA    | NA    | adrenergic signaling                                                                |
| rs7208257  | 17 | 4717202  | ARRB2  | Exon         | C | A, G, T | NA    | NA    | adrenergic signaling                                                                |
| rs12948783 | 17 | 74499400 | RHBDF2 | 5' near gene | A | G       | 0.103 | 0.111 | play roles the devel-opment of inflammation                                         |
| rs222747   | 17 | 3493200  | TRPV1  | Exon         | G | C       | 0.386 | 0.383 | nonselective cation channel that senses environmental irritants                     |
| rs4499491  | 20 | 43721419 | KCNS1  | 3'-UTR       | C | A       | 0.270 | 0.245 | voltage-gated potassium channel subunit                                             |
| rs734784   | 20 | 43723627 | KCNS1  | Exon         | C | T       | 0.203 | 0.194 | voltage-gated potassium channel subunit                                             |
| rs2834167  | 21 | 34640788 | IL10RB | Exon         | A | G       | 0.417 | 0.445 | inhibits the synthesis of a number of cytokines                                     |
| rs2070995  | 21 | 39086965 | KCNJ6  | 5' near gene | T | C       | 0.387 | 0.370 | potassium channel that regulates insulin secretion by glucose and neurotransmitters |
| rs2835914  | 21 | 39098850 | KCNJ6  | Intron       | C | G       | 0.499 | 0.486 | potassium channel that regulates insulin secretion by glucose and neurotransmitters |

|           |    |          |        |              |   |   |       |       |                                                                                     |
|-----------|----|----------|--------|--------------|---|---|-------|-------|-------------------------------------------------------------------------------------|
| rs2836050 | 21 | 39284835 | KCNJ6  | Intron       | T | C | 0.346 | 0.390 | potassium channel that regulates insulin secretion by glucose and neurotransmitters |
| rs8129919 | 21 | 39254540 | KCNJ6  | Intron       | G | A | 0.494 | 0.495 | potassium channel that regulates insulin secretion by glucose and neurotransmitters |
| rs2284015 | 22 | 37096573 | CACNG2 | 5' near gene | G | C | 0.332 | 0.297 | voltage-dependent calcium channel subunit                                           |
| rs4820242 | 22 | 36982675 | CACNG2 | 5' near gene | G | A | 0.461 | 0.460 | voltage-dependent calcium channel subunit                                           |
| rs2284017 | 22 | 37096927 | CACNG2 | 5' near gene | T | C | 0.481 | 0.483 | voltage-dependent calcium channel subunit                                           |
| rs2020917 | 22 | 19928884 | COMT   | 5' near gene | T | C | 0.297 | 0.304 | neurotransmitter degradation                                                        |
| rs4633    | 22 | 19950235 | COMT   | Exon         | T | C | 0.233 | 0.276 | neurotransmitter degradation                                                        |
| rs4646312 | 22 | 19948337 | COMT   | 5' near gene | C | T | 0.362 | 0.337 | neurotransmitter degradation                                                        |
| rs5993882 | 22 | 19937533 | COMT   | 5' near gene | G | T | 0.106 | 0.085 | neurotransmitter degradation                                                        |
| rs6267    | 22 | 19950263 | COMT   | 5' near gene | T | G | 0.061 | 0.049 | neurotransmitter degradation                                                        |
| rs6269    | 22 | 19949952 | COMT   | 5' near gene | G | A | 0.359 | 0.332 | neurotransmitter degradation                                                        |
| rs4818    | 22 | 19951207 | COMT   | 5' near gene | G | C | 0.364 | 0.327 | neurotransmitter degradation                                                        |
| rs8136867 | 22 | 21850504 | MAPK1  | Intron       | G | A | NA    | NA    | MAP kinase family                                                                   |
| rs1080985 | 22 | 42528382 | CYP2D6 | 5' near gene | C | G | 0.142 | 0.130 | drug metabolizing enzymes                                                           |

MAF: minor allele frequency. There were 26 SNPs without their MAF data because they did not enter the final analysis.

**Supplementary Table 2** Non-genetic factors associated with opioid response in univariate analyses.

| Variables                | Opioid dose  | Pain relief  | Opioid dose(class) | Pain relief(class) | Constipation |
|--------------------------|--------------|--------------|--------------------|--------------------|--------------|
| Age                      | 0.390        | 0.953        | 0.463              | 0.936              | <b>0.021</b> |
| Gender                   | 0.152        | 0.127        | 0.523              | 0.176              | 0.552        |
| BMI                      | 0.204        | 0.914        | 0.520              | 0.913              | 0.264        |
| Tumor diagnosis          | 0.172        | 0.463        | 0.411              | 0.446              | <b>0.005</b> |
| PS                       | <b>0.006</b> | <b>0.001</b> | <b>0.028</b>       | 0.129              | 0.079        |
| Tumor metastasis status  |              |              |                    |                    |              |
| Bone                     | <b>0.046</b> | 0.807        | 0.059              | 0.053              | 0.057        |
| Liver                    | 0.566        | 0.074        | 0.322              | 0.760              | 0.930        |
| CNS                      | 0.877        | 0.480        | 0.324              | 0.518              | 0.926        |
| Lung                     | 0.542        | <b>0.014</b> | 0.612              | 0.884              | 0.506        |
| Other                    | 0.256        | 0.335        | 0.091              | 0.275              | 0.658        |
| Opioid tolerance         | <b>0.000</b> | 0.251        | <b>0.000</b>       | <b>0.024</b>       | <b>0.010</b> |
| Pain category            | 0.919        | 0.595        | 0.922              | 0.645              | 0.259        |
| NRS2002 score            | 0.210        | 0.875        | 0.366              | <b>0.030</b>       | 0.934        |
| Number of adjuvant       |              |              |                    |                    |              |
| analgesics               | <b>0.000</b> | 0.741        | <b>0.001</b>       | 0.119              | 0.149        |
| SDS score                | <b>0.009</b> | <b>0.001</b> | <b>0.049</b>       | <b>0.000</b>       | <b>0.017</b> |
| ALT (U/L)                | 0.491        | 0.764        | 0.553              | 0.854              | 0.872        |
| AST (U/L)                | 0.458        | 0.863        | 0.406              | 0.554              | 0.621        |
| LDH (U/L)                | 0.405        | 1.000        | 1.000              | 0.881              | 0.153        |
| Creatinine serum         |              |              |                    |                    |              |
| concentration (μmol/L)   | 0.064        | 0.584        | 0.493              | 0.392              | 0.473        |
| Opioid                   | 0.054        | 0.311        | <b>0.008</b>       | 0.500              | 0.283        |
| Time since onset of pain |              |              |                    |                    |              |
| symptoms (mo)            | 0.059        | 0.259        | <b>0.001</b>       | 0.865              | 0.497        |
| Time since start of      |              |              |                    |                    |              |
| opioid treatment (mo)    | 0.699        | 0.574        | 1.000              | 0.212              | 0.255        |
| Pain relief (%)          | <b>0.000</b> | /            | <b>0.008</b>       | /                  | /            |
| Opioid dose (OEDD)       | /            | <b>0.001</b> | /                  | <b>0.000</b>       | <b>0.000</b> |
| Age (class)              | 0.113        | 0.446        | 0.412              | 0.067              | 0.755        |
| BMI (class)              | 0.306        | <b>0.003</b> | 0.680              | 0.419              | 0.339        |
| Time since start of      |              |              |                    |                    |              |
| opioid treatment(class)  | <b>0.000</b> | 0.900        | <b>0.000</b>       | <b>0.002</b>       | <b>0.006</b> |

Data in boldface are  $p < 0.05$ ; BMI, body mass index; PS, performance status; NRS2002: nutritional risk screening scoring; CNS, central nervous system; SDS, Self-Rating Depression Scale; ALT, alanine aminotransferase; AST, aspartate transaminase; LDH, lactate dehydrogenase; mo, month; OEDD, oral oxycodone equivalent daily dose.

**Supplementary Table 3** SNPs with an uncorrected p value of less than 0.05 in the discovery sample in the dominant model of the three phenotypes

| phenotype                | Gene     | SNP        | minor allele | major allele | Development sample (n = 572) |       |       | Validation sample (n = 286) |       |
|--------------------------|----------|------------|--------------|--------------|------------------------------|-------|-------|-----------------------------|-------|
|                          |          |            |              |              | $\beta$                      | $P^1$ | $P^2$ | $\beta$                     | $P^1$ |
| Opioid dose<br>(logOEDD) | ABCC4    | rs9524885  | T            | C            | -0.050                       | 0.005 | 0.525 | 0.006                       | 0.825 |
|                          | OPRM1    | rs1799971  | G            | A            | 0.043                        | 0.014 | 0.670 | -0.003                      | 0.918 |
|                          | TNF      | rs1799964  | C            | T            | 0.043                        | 0.023 | 0.670 | -0.045                      | 0.105 |
|                          | STAT6    | rs167769   | T            | C            | -0.040                       | 0.025 | 0.670 | -0.048                      | 0.065 |
|                          | OPRD1    | rs2234918  | C            | T            | -0.040                       | 0.030 | 0.670 | -0.015                      | 0.554 |
|                          | OPRM1    | rs6912029  | T            | G            | 0.046                        | 0.046 | 0.839 | -0.019                      | 0.570 |
|                          | ABCC4    | rs9524885  | T            | C            | 0.362                        | 0.002 | 0.167 | -0.025                      | 0.891 |
| Pain relief              | OPRM1    | rs6912029  | T            | G            | -0.408                       | 0.006 | 0.502 | 0.174                       | 0.393 |
|                          | OPRM1    | rs563649   | T            | C            | -0.397                       | 0.008 | 0.590 | 0.109                       | 0.595 |
|                          | NFKB1A   | rs8904     | A            | G            | -0.287                       | 0.016 | 0.430 | 0.050                       | 0.760 |
|                          | OPRM1    | rs1799971  | G            | A            | -0.245                       | 0.034 | 0.696 | -0.137                      | 0.395 |
|                          | STAT6    | rs167769   | T            | C            | 0.241                        | 0.039 | 0.696 | 0.280                       | 0.081 |
|                          | CREB1    | rs12645107 | A            | G            | 0.235                        | 0.044 | 0.696 | -0.215                      | 0.186 |
| Opioid dose<br>(class)   |          |            |              |              | OR                           | $P^1$ | $P^2$ | OR                          | $P^1$ |
|                          | ABCC4    | rs9524885  | T            | C            | 1.915                        | 0.004 | 0.408 | 0.789                       | 0.493 |
|                          | OPRD1    | rs2234918  | A            | T            | 1.777                        | 0.017 | 0.471 | 1.396                       | 0.353 |
|                          | RHBDF2   | rs12948783 | A            | G            | 1.998                        | 0.026 | 0.471 | 1.200                       | 0.668 |
|                          | OPRK1    | rs7836120  | C            | T            | 1.662                        | 0.028 | 0.471 | 0.770                       | 0.699 |
|                          | OPRK1    | rs963549   | T            | C            | 0.547                        | 0.042 | 0.471 | 2.422                       | 0.109 |
| OPRM1                    | rs562859 | C          | T            | 1.747        | 0.047                        | 0.471 | 0.983 | 0.963                       |       |

|              |              |           |   |   |       |       |       |       |       |
|--------------|--------------|-----------|---|---|-------|-------|-------|-------|-------|
|              | ARRB2        | rs2036657 | G | A | 0.633 | 0.047 | 0.471 | 0.937 | 0.537 |
|              | OPRM1        | rs497976  | T | G | 1.845 | 0.048 | 0.471 | 0.760 | 0.486 |
|              | STAT6        | rs3024971 | G | T | 0.139 | 0.017 | 0.672 | 0.112 | 0.103 |
|              | UGT2B7       | rs7438135 | G | A | 0.206 | 0.030 | 0.672 | 1.507 | 0.749 |
| Pain relief  | UGT2B7       | rs4587017 | T | G | 0.206 | 0.030 | 0.672 | 1.507 | 0.749 |
| (class)      | UGT2B7       | rs7439366 | T | C | 0.207 | 0.030 | 0.672 | 1.507 | 0.749 |
|              | UGT2B7       | rs6851533 | T | C | 0.209 | 0.032 | 0.672 | 1.507 | 0.749 |
|              | IL13         | rs1295686 | T | C | 3.548 | 0.041 | 0.723 | 0.250 | 0.323 |
|              | PTGS2        | rs5275    | G | A | 0.528 | 0.001 | 0.093 | 0.570 | 0.030 |
| Constipation | OPRM1        | rs1799971 | G | A | 1.513 | 0.020 | 0.787 | 0.886 | 0.778 |
|              | CYP2D6       | rs1080985 | C | G | 1.520 | 0.042 | 0.787 | 0.580 | 0.056 |
|              | LOC105369944 | rs7965399 | C | T | 0.693 | 0.044 | 0.787 | 0.818 | 0.641 |

OR: odds ratio;  $P^1$ : the uncorrected p value,  $P^2$ : p value corrected by FDR\_BH.

**Supplementary Table 4** All the haplotypes constructed in this study and their frequency

| Gene   | SNPs                                                                                                            | Chr | Haplotype | Haplotype frequency             |                                |
|--------|-----------------------------------------------------------------------------------------------------------------|-----|-----------|---------------------------------|--------------------------------|
|        |                                                                                                                 |     |           | Development sample<br>(n = 572) | Validation sample<br>(n = 286) |
| OPRD1  | rs419335, rs2236857                                                                                             | 1   | AT        | 0.809                           | 0.822                          |
|        |                                                                                                                 |     | GC        | 0.104                           | 0.091                          |
|        |                                                                                                                 |     | GT        | 0.088                           | 0.083                          |
| OPRD1  | rs529520, rs581111                                                                                              | 1   | CG        | 0.862                           | 0.881                          |
|        |                                                                                                                 |     | AA        | 0.077                           | 0.082                          |
|        |                                                                                                                 |     | AG        | 0.061                           | 0.037                          |
| P2RY12 | rs3732765, rs9859538                                                                                            | 3   | GG        | 0.857                           | 0.837                          |
|        |                                                                                                                 |     | AA        | 0.14                            | 0.154                          |
|        |                                                                                                                 |     | GGGATCACA | 0.363                           | 0.396                          |
| UGT2B7 | rs4296738, rs4235108,<br>rs4587017, rs7438135,<br>rs7668282, rs7439366,<br>rs10028494, rs6851533,<br>rs12645107 | 4   | GATGTTCTG | 0.247                           | 0.233                          |
|        |                                                                                                                 |     | AGGATCACG | 0.17                            | 0.165                          |
|        |                                                                                                                 |     | GAGACCACG | 0.078                           | 0.084                          |
|        |                                                                                                                 |     | GATGTTATG | 0.076                           | 0.072                          |
|        |                                                                                                                 |     | GAGATCACG | 0.044                           | 0.023                          |
| ADRB2  | rs12654778, rs1042713                                                                                           | 5   | GG        | 0.429                           | 0.422                          |
|        |                                                                                                                 |     | AA        | 0.362                           | 0.389                          |
|        |                                                                                                                 |     | GA        | 0.207                           | 0.186                          |
| OPRM1  | rs6912029, rs1799971,<br>rs589046, rs563649                                                                     | 6   | GACC      | 0.51                            | 0.475                          |
|        |                                                                                                                 |     | GGCC      | 0.34                            | 0.377                          |
|        |                                                                                                                 |     | TATT      | 0.086                           | 0.089                          |
|        |                                                                                                                 |     | GATC      | 0.058                           | 0.051                          |
| ABCB1  | rs1045642, rs4437575                                                                                            | 7   | GA        | 0.423                           | 0.428                          |
|        |                                                                                                                 |     | AA        | 0.377                           | 0.377                          |
|        |                                                                                                                 |     | GG        | 0.199                           | 0.195                          |
| ABCB1  | rs2235013, rs2235033,<br>rs1128503, rs1202170                                                                   | 7   | CAAT      | 0.638                           | 0.649                          |
|        |                                                                                                                 |     | TGGC      | 0.346                           | 0.339                          |
| ADRA2A | rs1800545, rs11195419                                                                                           | 10  | GC        | 0.826                           | 0.846                          |
|        |                                                                                                                 |     | AA        | 0.17                            | 0.153                          |
|        |                                                                                                                 |     | GT        | 0.696                           | 0.727                          |
| STAT6  | rs841718, rs3024971                                                                                             | 12  | AT        | 0.245                           | 0.208                          |
|        |                                                                                                                 |     | AG        | 0.059                           | 0.065                          |
|        |                                                                                                                 |     | GGTGA     | 0.807                           | 0.809                          |
| ARRB2  | rs3786047, rs16954146,<br>rs1045280, rs2271167,<br>rs2036657                                                    | 17  | AACAG     | 0.178                           | 0.167                          |
|        |                                                                                                                 |     | CC        | 0.52                            | 0.517                          |
| CACNG2 | rs2284015, rs2284017                                                                                            | 22  | GT        | 0.332                           | 0.298                          |
|        |                                                                                                                 |     | CT        | 0.148                           | 0.185                          |

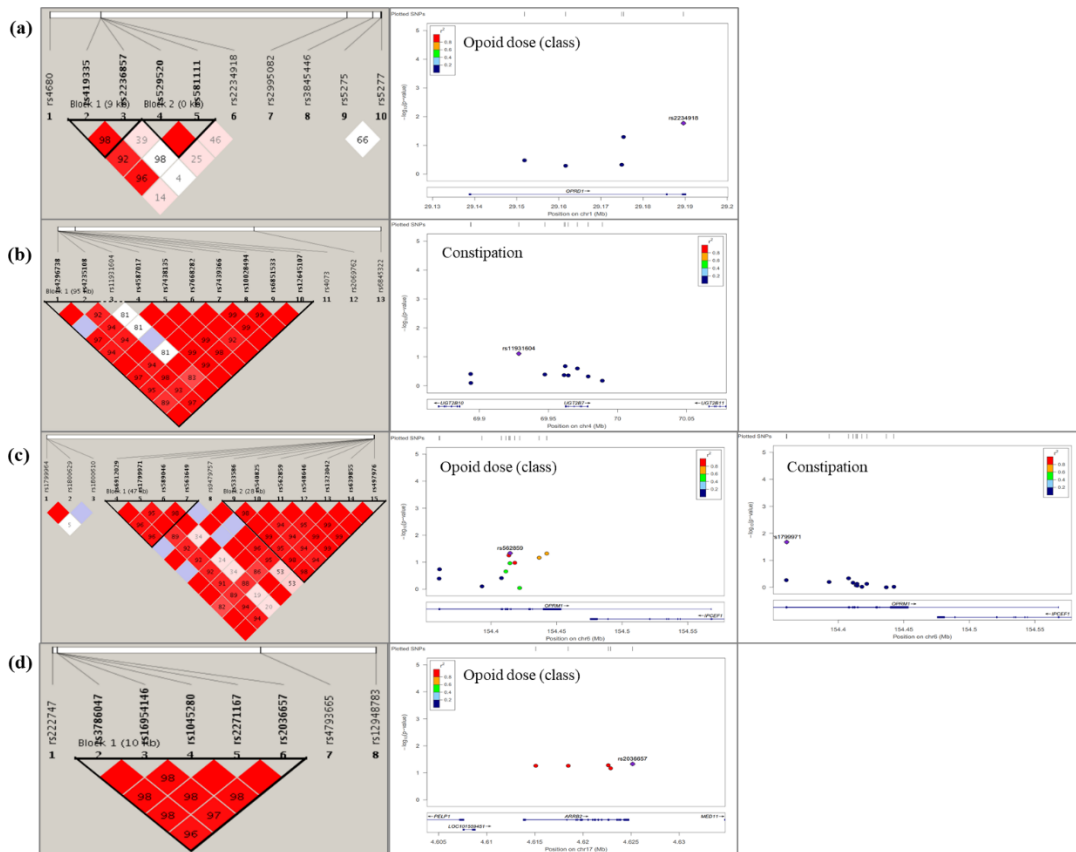

**Supplementary Fig. 1** Linkage disequilibrium (LD) and locuszoom plot of association results of singlenucleotide polymorphisms (SNPs) in different phenotypes. (a) Chr. 1 OPRD1 gene, (b) Chr. 4 UGT2B7 gene, (c) Chr. 6 OPRM1, (d) Chr. 17 ARRB2 gene. For each gene, Haploview LD graph of SNPs was visualized using the Haploview software 4.2. LD was calculated using  $D'$  ( $0 =$  no disequilibrium;  $1 =$  maximum disequilibrium). The numbers inside the squares are  $100 D'$ . In the locuszoom plot, the left vertical axis shows association P-values in the develop stage on the  $-\log_{10}$  scale and the horizontal axis shows the chromosomal position. The purple diamond is the most significant SNP at each plot. LD ( $r^2$ ) was estimated from the 1000 Genomes Project ASN data (Nov2014, build GRCh37/hg19), and was colour coded as a heatmap from dark blue ( $0 \leq r^2 < 0.2$ ) to red ( $0.8 \geq r^2 > 1.0$ ).
